# Supplementary material for: Hierarchical Cu/Cu(OH)2 nanorod arrays grown on Cu foam as a high-performance 3D self-supported electrode for enzyme-free glucose sensing
Source: Royal Society of Chemistry journal article supplement (doi:10.1039/c6ra19576h), 2016-01-01
Supplement: c6ra19576h1.pdf [file c6ra19576h1.pdf]

## Electronic Supplementary Information

Hierarchical Cu/Cu(OH)<sub>2</sub> nanorod arrays grown on Cu foam as a high-performance 3D self-supported electrode for enzyme-free glucose sensing

Lili Bie, Xue Luo, Qingqing He, Daiping He, Yan Liu, Ping Jiang\*

Key Laboratory of Green Synthesis and Applications, College of Chemistry, Chongqing Normal University, Chongqing 401331, China

\* Corresponding authors.

E-mail addresses: [jphdp868@126.com](mailto:jphdp868@126.com)

Tel: +86 23 65362777

Fax: +86 23 65362777

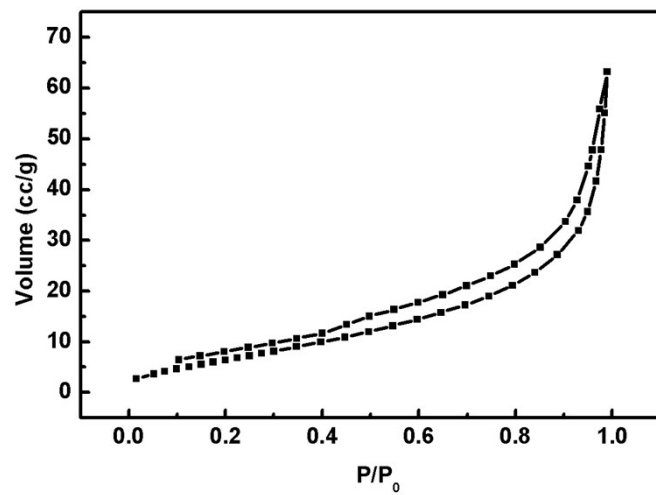

Fig S1. Nitrogen adsorption/desorption isotherm plot of Cu/Cu(OH)<sub>2</sub> NRA scratched down from the CFL.

Table S1. Analytical performances of Cu/Cu(OH)<sub>2</sub> NRA/CF and other copper-based enzyme-free glucose sensors with hierarchical nanostructure.

| Electrode                                             | Applied potential (V) | Sensitivity (mA mM <sup>-1</sup> cm <sup>-2</sup> ) | Linear range (mM) | Detection limit (μM) | Reference |
|-------------------------------------------------------|-----------------------|-----------------------------------------------------|-------------------|----------------------|-----------|
| Cu(OH) <sub>2</sub> nanotube arrays                   | 0.4                   | 0.418                                               | Up to 3           | 0.5                  | 38        |
| Cu foam                                               | 0.55                  | 5.85                                                | 0.001 to 0.5      | 0.5                  | 41        |
| CuO/TiO <sub>2</sub> nanocomposites                   | 0.7                   | 1.321                                               | 0.01 to 2         | 0.39                 | 42        |
| Hierarchical CuO nanoflowers                          | 0.5                   | 2.657                                               | 0.01 to 5         | 1.71                 | 43        |
| Hyper-branched Cu@Cu <sub>2</sub> O coaxial nanowires | 0.6                   | 1.42                                                | 0.0007 to 2       | 0.04                 | 21        |
| CuO/ZnO hybrid hierarchical nanostructures            | 0.6                   | 0.408                                               | 0.1 to 1          | 18                   | 44        |
| Chrysanthemum-like CuO hierarchical film              | 0.6                   | 3.252                                               | 0.002 to 2.3      | 0.6                  | 36        |
| Candock-like CuO hierarchical film                    | 0.6                   | 4.078                                               | 0.005 to 2        | 1.2                  | 36        |
| Dandelion-like CuO hierarchical film                  | 0.6                   | 5.368                                               | 0.005 to 1.6      | 1.2                  | 36        |
| Cu(OH) <sub>2</sub> /PGF                              | 0.6                   | 3.36                                                | 0.0012 to 6       | 1.2                  | 45        |
| Cu/Cu(OH) <sub>2</sub> NRA/CF                         | 0.5                   | 9.180                                               | 0.001 to 1        | 0.45                 | This work |

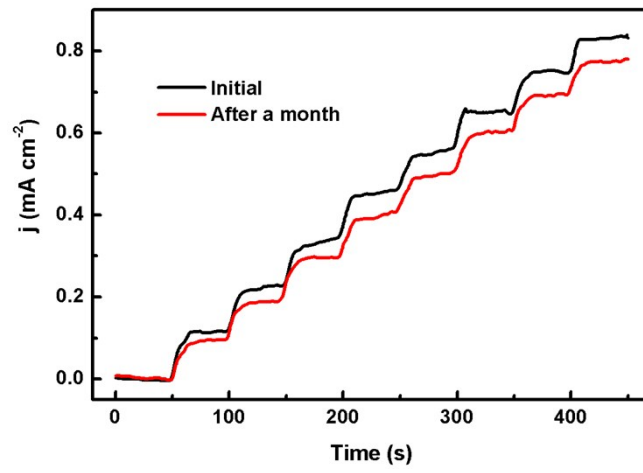

Fig. S2. Amperometric response of Cu/Cu(OH)<sub>2</sub> NRA/CF in 0.01 mM glucose initially and after a month.
